# Supplementary material for: Risk factors and immunomodulators use in steroid-refractory checkpoint inhibitor pneumonitis
Source: HighWire-hosted journal article supplement (doi:10.1136/jitc-2023-006982), 2023-06-01
Supplement: jitc-2023-006982supp006_data_supplement.pdf [file jitc-2023-006982supp006_data_supplement.pdf]

**Supplemental Table 1** Details of previous ILD in enrolled patients

| <b>Radiological sign<sup>a</sup></b> | <b>N (%)</b> | <b>Possible etiology</b>                  | <b>N (%)</b> |
|--------------------------------------|--------------|-------------------------------------------|--------------|
| Reticular shadow                     | 24 (68.6)    | Idiopathic                                | 21 (60.0)    |
| Ground-glass opacities               | 12 (34.3)    | Infection-associated inflammation induced | 6 (17.1)     |
| Honeycombing change                  | 5 (14.3)     | Non-infectious inflammation induced       | 5 (14.3)     |
| interstitial fibrosis                | 3 (8.6)      | Radiation-induced                         | 2 (5.7)      |
| Bronchial vascular bundle thickened  | 2 (5.7)      | Drug-induced                              | 1 (2.9)      |
| Bronchial traction                   | 1 (2.9)      | Unidentified                              | 1 (2.9)      |
| Micronodules                         | 1 (2.9)      |                                           |              |

<sup>a</sup> Percentages could sum to >100% because categories are not mutually exclusive. ILD, interstitial lung disease.
